# Supplementary material for: Benthic Opportunistic Polychaete/Amphipod Ratio: An Indicator of Pollution or Modification of the Environment by Macroinvertebrates?
Source: MDPI journal article supplement (doi:10.3390/jmse11010190), 2023-01-12
Supplement: s1 [file s1]

## Supplementary Material

# Benthic opportunistic polychaete/amphipod ratio: indicator of pollution or modification of environment by macroinvertebrates?

Alexey A. Maximov\* and Nadezhda A. Berezina

Zoological Institute of the Russian academy of Sciences, Universitetskaya nab. 1, 199034  
St. Petersburg, Russia

\*Correspondece: alexeymaximov@mail.ru

Table S1. Hydrographic conditions at study sites

| Site | Date      | Depth, m | Temperature, °C |        | Salinity, psu |          | Oxygen, ml/l |        |
|------|-----------|----------|-----------------|--------|---------------|----------|--------------|--------|
|      |           |          | surface         | bottom | surface       | bottom m | surface      | bottom |
| 4F   | 06.08.201 | 30       | 15.2            | 3.6    | 3.46          | 5.48     | 6.61         | 3.08   |
| 2 U  | 06.08.201 | 38       | 17.4            | 4.4    | 2.95          | 6.18     | 7.28         | 3.92   |
| 17F  | 06.08.201 | 52       | 17.1            | 4.3    | 3.91          | 7.28     | 6.82         | 2.16   |
| 2F5  | 07.08.201 | 38       | 17.1            | 4.4    | 2.70          | 6.2      | 7.20         | 3.90   |
| 9F   | 07.08.201 | 36       | 17.1            | 4.4    | 2.70          | 7.1      | 7.50         | 3.91   |
| 6K   | 08.08.201 | 27       | 17.1            | 4.4    | 2.73          | 5.26     | 7.01         | 3.69   |
| 8F   | 08.08.201 | 30       | 17.1            | 4.7    | 2.70          | 5.30     | 7.76         | 4.51   |
| 4F5  | 08.08.201 | 30       | 17.1            | 4.7    | 2.96          | 5.28     | 7.76         | 4.51   |
| 1F5  | 08.08.201 | 26       | 16.2            | 3.8    | 2.99          | 5.26     | 7.22         | 3.17   |
| 4F   | 15.09.202 | 28       | 16.7            | 16.0   | 1.17          | 2.29     | 7.90         | 7.20   |
| 2U   | 15.09.202 | 36       | 16.6            | 15.3   | 2.14          | 2.61     | 7.30         | 6.80   |
| 17F  | 16.09.202 | 52       | 15.6            | 11.5   | 3.02          | 3.55     | 7.30         | 4.80   |
| 9F   | 15.09.202 | 35       | 16.2            | 15.0   | 2.17          | 3.00     | 8.30         | 7.40   |
| 6K   | 15.09.202 | 26       | 16.0            | 14.9   | 2.70          | 3.03     | 7.30         | 6.70   |
| 6L   | 15.09.202 | 28       | 15.9            | 14.9   | 2.70          | 3.1      | 8.50         | 7.20   |
| 1L   | 16.09.202 | 27       | 15.3            | 14.9   | 3.14          | 3.3      | 7.9          | 6.9    |
| 2L   | 16.09.202 | 33       | 15.1            | 14.3   | 3.25          | 3.46     | 7.8          | 6.6    |
| 20F  | 16.09.202 | 47       | 15.6            | 11.5   | 3.19          | 4.02     | 7.9          | 4.9    |
| FZ19 | 15.09.202 | 27       | 16.2            | 14.0   | 2.14          | 2.33     | 7.0          | 6.5    |

Table S2. Standardized values of pollution related variables.

| Site | Date       | Variable                     |                            |                           |       |                          |        |                         |                         |                         |                         |                         |                                         |       |
|------|------------|------------------------------|----------------------------|---------------------------|-------|--------------------------|--------|-------------------------|-------------------------|-------------------------|-------------------------|-------------------------|-----------------------------------------|-------|
|      |            | Total HC, mg l <sup>-1</sup> | TP wat, mg l <sup>-1</sup> | Chl-a, µg l <sup>-1</sup> | WP    | PAH, mg kg <sup>-1</sup> | TOC, % | Hg, mg kg <sup>-1</sup> | Cd, mg kg <sup>-1</sup> | Cu, mg kg <sup>-1</sup> | Pb, mg kg <sup>-1</sup> | Zn, mg kg <sup>-1</sup> | TP <sub>sed</sub> , mg kg <sup>-1</sup> | SP    |
| 4F   | 06.08.2019 | -0.48                        | 0.93                       | -0.15                     | 0.10  | -1.02                    | 0.16   | 0.19                    | -0.23                   | 0.45                    | 0.68                    | 0.07                    | -1.57                                   | -0.16 |
| 2 GM | 06.08.2019 | -0.46                        | -0.23                      | 0.12                      | -0.19 | -0.96                    | -0.32  | 1.08                    | 0.24                    | 1.33                    | 1.46                    | 0.29                    | -1.08                                   | 0.26  |
| 17F  | 06.08.2019 | -0.52                        | -0.29                      | -0.44                     | -0.42 | -0.22                    | 0.16   | 0.78                    | 1.37                    | 1.55                    | 0.98                    | 0.40                    | 1.39                                    | 0.80  |
| 2F5  | 07.08.2019 | -0.48                        | -0.36                      | -0.09                     | -0.31 | -0.97                    | -0.85  | -1.30                   | 0.03                    | 0.23                    | 0.07                    | -0.05                   | -0.09                                   | -0.37 |
| 9F   | 07.08.2019 | -0.50                        | -0.48                      | -0.88                     | -0.62 | -1.07                    | -0.61  | 0.04                    | 0.01                    | 0.67                    | 0.98                    | -0.24                   | 1.39                                    | 0.15  |
| 6K   | 08.08.2019 | 0.94                         | -0.48                      | -0.87                     | -0.14 | -1.11                    | -0.32  | -0.56                   | -0.50                   | -0.10                   | -0.11                   | -0.10                   | 0.40                                    | -0.30 |
| 8F   | 08.08.2019 | 0.76                         | -0.48                      | 0.00                      | 0.09  | -1.03                    | -0.85  | -0.11                   | -0.37                   | 0.01                    | -0.17                   | -0.33                   | 0.89                                    | -0.24 |
| 4F5  | 08.08.2019 | 0.94                         | -0.48                      | -0.81                     | -0.12 | -0.90                    | -1.09  | -1.15                   | -0.43                   | -0.65                   | -0.23                   | -0.39                   | -1.08                                   | -0.74 |
| 1F5  | 08.08.2019 | 3.34                         | -0.36                      | 0.50                      | 1.16  | -0.49                    | -0.56  | -0.26                   | -0.50                   | -0.43                   | -0.41                   | -0.37                   | -1.32                                   | -0.54 |
| 4F   | 15.09.2020 | -0.35                        | -0.23                      | -0.01                     | -0.20 | 1.86                     | -1.56  | 1.82                    | 0.17                    | 1.44                    | 1.28                    | -0.61                   | -0.09                                   | 0.54  |
| 2GM  | 15.09.2020 | -0.59                        | -0.48                      | -2.11                     | -1.06 | 0.10                     | 0.26   | -0.41                   | 3.38                    | -0.21                   | 1.46                    | 3.90                    | -0.09                                   | 1.05  |
| 9F   | 15.09.2020 | -0.46                        | -0.48                      | 0.90                      | -0.02 | 0.65                     | 1.02   | 0.78                    | 0.17                    | 0.45                    | 0.37                    | 0.13                    | -0.09                                   | 0.44  |
| 6K   | 15.09.2020 | 0.94                         | -0.23                      | 0.30                      | 0.34  | 1.13                     | 0.43   | -0.30                   | -0.37                   | 0.01                    | -0.17                   | -0.15                   | -0.09                                   | 0.06  |
| 6L   | 15.09.2020 | -0.54                        | -0.48                      | 1.53                      | 0.17  | 0.94                     | -1.57  | -1.71                   | -0.70                   | -0.76                   | -1.14                   | -0.43                   | 0.40                                    | -0.62 |
| 1L   | 16.09.2020 | -0.61                        | -0.36                      | 0.25                      | -0.24 | 1.74                     | 0.90   | -1.14                   | -0.74                   | -1.20                   | -1.44                   | -0.61                   | 1.39                                    | -0.14 |
| 2L   | 16.09.2020 | -0.18                        | 0.35                       | -0.71                     | -0.18 | 1.21                     | 1.57   | -0.70                   | -0.23                   | -1.53                   | -1.02                   | -0.42                   | 1.63                                    | 0.06  |
| 17F  | 16.09.2020 | -0.57                        | -0.48                      | -0.98                     | -0.68 | 0.08                     | 1.59   | 1.23                    | 0.70                    | 1.33                    | 0.43                    | 0.22                    | -0.09                                   | 0.69  |
| 20F  | 16.09.2020 | -0.63                        | 3.70                       | 1.56                      | 1.54  | 0.12                     | 1.57   | 1.53                    | -1.06                   | -0.76                   | -1.26                   | -0.57                   | -0.83                                   | -0.16 |
| FZ19 | 15.09.2020 | -0.55                        | 0.93                       | 1.91                      | 0.76  | -0.05                    | 0.05   | 0.19                    | -0.93                   | -1.86                   | -1.75                   | -0.75                   | -1.08                                   | -0.77 |
| Mean |            | 0.039                        | 0.016                      | 6.460                     |       | 0.165                    | 3.766  | 0.137                   | 0.874                   | 37.895                  | 43.847                  | 165.947                 | 0.015                                   |       |
| SD   |            | 0.054                        | 0.016                      | 2.081                     |       | 0.118                    | 2.083  | 0.067                   | 0.748                   | 9.085                   | 16.508                  | 108.784                 | 0.004                                   |       |

Notes. Total HC, mg l<sup>-1</sup>, TP wat, mg l<sup>-1</sup> and Chl-a, µg l<sup>-1</sup> are respectively concentrations of total hydrocarbon, total phosphorus and chlorophyll-a in water, WP is water pollution index, PAH, µg l<sup>-1</sup> is concentration of polycyclic aromatic hydrocarbons in sediments, TOC, % is total organic content, Hg, mg kg<sup>-1</sup>, Cd, mg kg<sup>-1</sup>, Cu, mg kg<sup>-1</sup>, Pb, mg kg<sup>-1</sup>, Zn, mg kg<sup>-1</sup> are concentrations of respective metals in sediments, TP<sub>sed</sub>, mg kg<sup>-1</sup> is concentration of total phosphorus in sediment, SP is sediment pollution index.

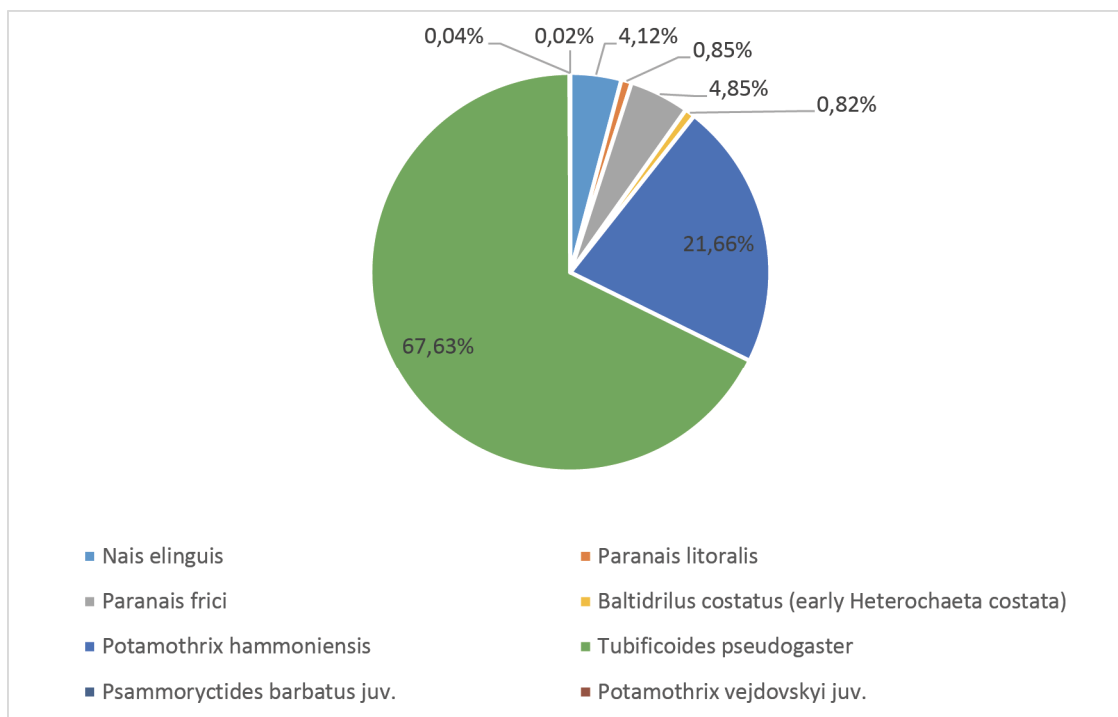

**Figure S1.** Percentage of different oligochaete species in the total abundance of oligochaetes.

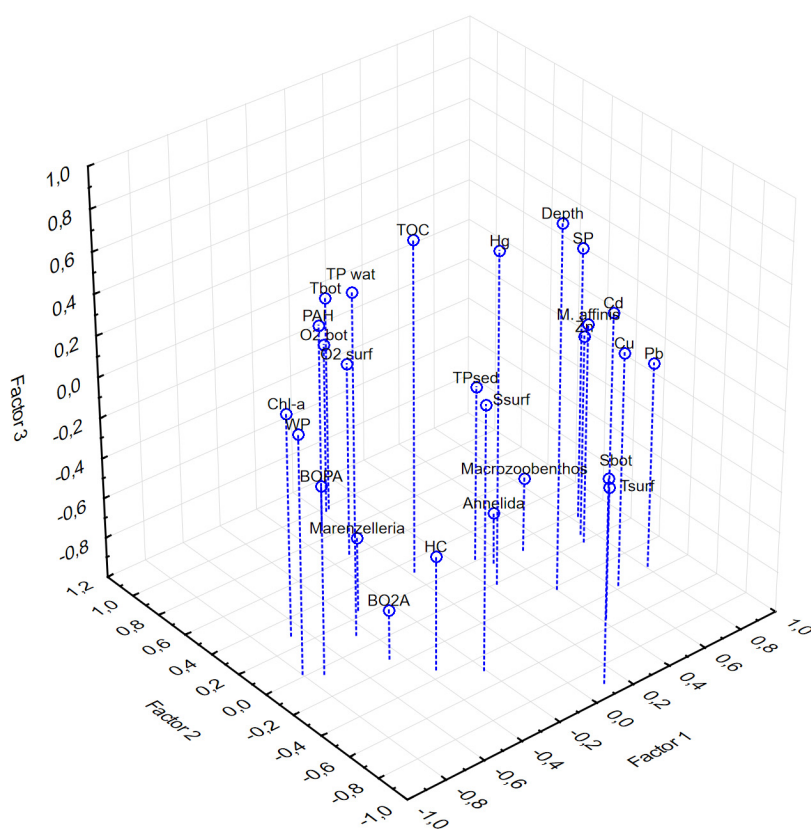

**Figure S2.** Factor loadings for the first three principal components. See designations in Tables 2 and 3.
